# Supplementary material for: Preparation and pharmacokinetic evaluation of a sertraline-methylpropyphenazone prodrug: a comparative metabolic study on the plasma and brain tissues of rats using LC-MS/MS analysis
Source: Royal Society of Chemistry journal article supplement (doi:10.1039/d4ra08357a), 2025-01-01

### Supplementary data

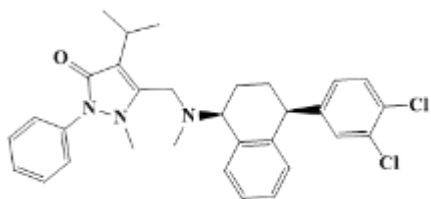

*Sertraline – methyl-propyphenazone (SER-MP)*

#### *Purification*

The compound was purified by column chromatography over silica gel, mobile phase dichloromethane (DCM), and then 9:1 DCM/ethyl acetate. The obtained purity, as an oily substance, reached 98.8%, as determined by HPLC-DAD at 254 nm.

#### **High-Resolution Mass of SER-MP**

##### *Instrument*

Thermo Scientific LTQ-XL Orbitrap mass spectrometer coupled with Accela autosampler and Accela pump (San Jose, CA, USA). The ion source; electrospray ionization (ESI) compartment. The system was controlled with Xcalibur® Thermo Fisher Scientific Inc, version 2.07 SP1. Spray voltage, 5.0 kv, sheath gas flow rate, 42 mL/min, auxiliary gas, 5 mL/min, capillary voltage, 60v, capillary temperature, 335 °C, scan range, 100 - 700 m/z. The collision energy was 35 v. Column, Eclipse Plus C18, 3.5 µm, 4.6X100 mm (Agilent, Palo Alto, USA), column oven, 25 °C. The mobile system comprised acetonitrile (90%), water containing 0.1% glacial acetic acid 100% (10%). The flow rate was 400 µL/min. A positive ESI-MS mode was applied.

##### *Result*

The delta mass =  $+m/z$  534.20789- 534.20038 =  $m/z$  0.00751

SERMP #494 RT: 4.91 AV: 1 NL: 4.82E5

T: ITMS + c ESI Full ms [50.00-700.00]

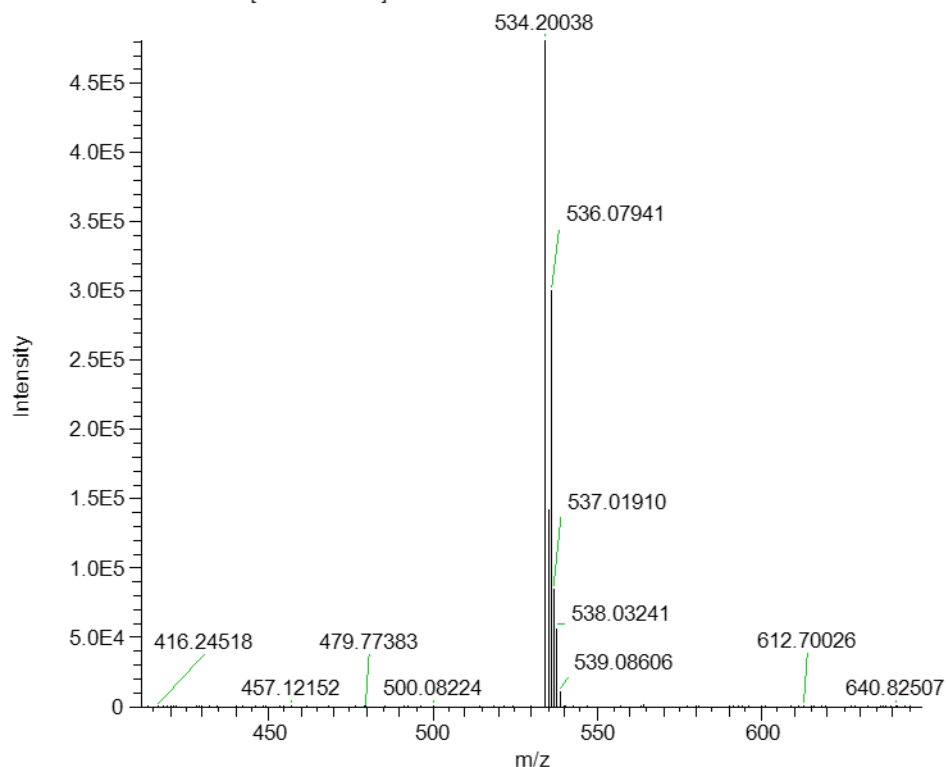

**Fig. S1.** Mass spectrum of SER-MP

## **<sup>1</sup>H-NMR & <sup>13</sup>C-NMR analysis**

The <sup>1</sup>H-NMR and <sup>13</sup>C-NMR analysis was repeated using Nuclear Magnetic Resonance, Ultra Shield 600, Bruker, Billerica, Massachusetts, United States.

The 600 MHz NMR data was added (Fig. S2 & Fig. S3).

Adjusted paragraph:

<sup>1</sup>H NMR (600 MHz, CDCl<sub>3</sub>) δ 7.81 (d, J = 7.8 Hz, 1H), 7.49 – 7.43 (m, 4H), 7.38 – 7.32 (m, 2H), 7.27 – 7.24 (m, 1H), 7.22 (t, J = 7.2 Hz, 1H), 7.13 (d, J = 6.8 Hz, 1H), 6.95 (d, J = 7.2 Hz, 1H), 6.87 (dd, J = 6.6, 8.4 Hz, 1H), 4.18 (t, J = 4.2 Hz, 1H), 4.09 – 4.01 (m, 1H), 3.82 (d, J = 14.4 Hz, 1H), 3.65 (d, J = 13.8 Hz, 1H), 3.24 (s, 3H), 2.90 (t, J = 7.2 Hz, 1H), 2.27 (s, 3H), 2.32 – 2.31 (m, 1H), 2.30 – 2.22 (m, 1H), 1.86 – 1.73 (m, 2H), 1.35 (d, J = 6.6 Hz, 3H), 1.32 (d, J = 7.2 Hz, 3H) (Fig. S2).

<sup>13</sup>C NMR (150 MHz, CDCl<sub>3</sub>) δ 165.39, 152.18, 147.44, 138.82, 138.50, 135.52, 129.19, 128.37, 128.32, 127.40, 126.21, 123.70, 118.22, 60.25, 48.32, 43.76, 37.01, 36.36, 30.18, 29.92, 24.75, 21.44, 21.41, 15.46 (Fig. S3).

Fig. S2. <sup>1</sup>H NMR spectrum of SER-MP in CDCl<sub>3</sub>

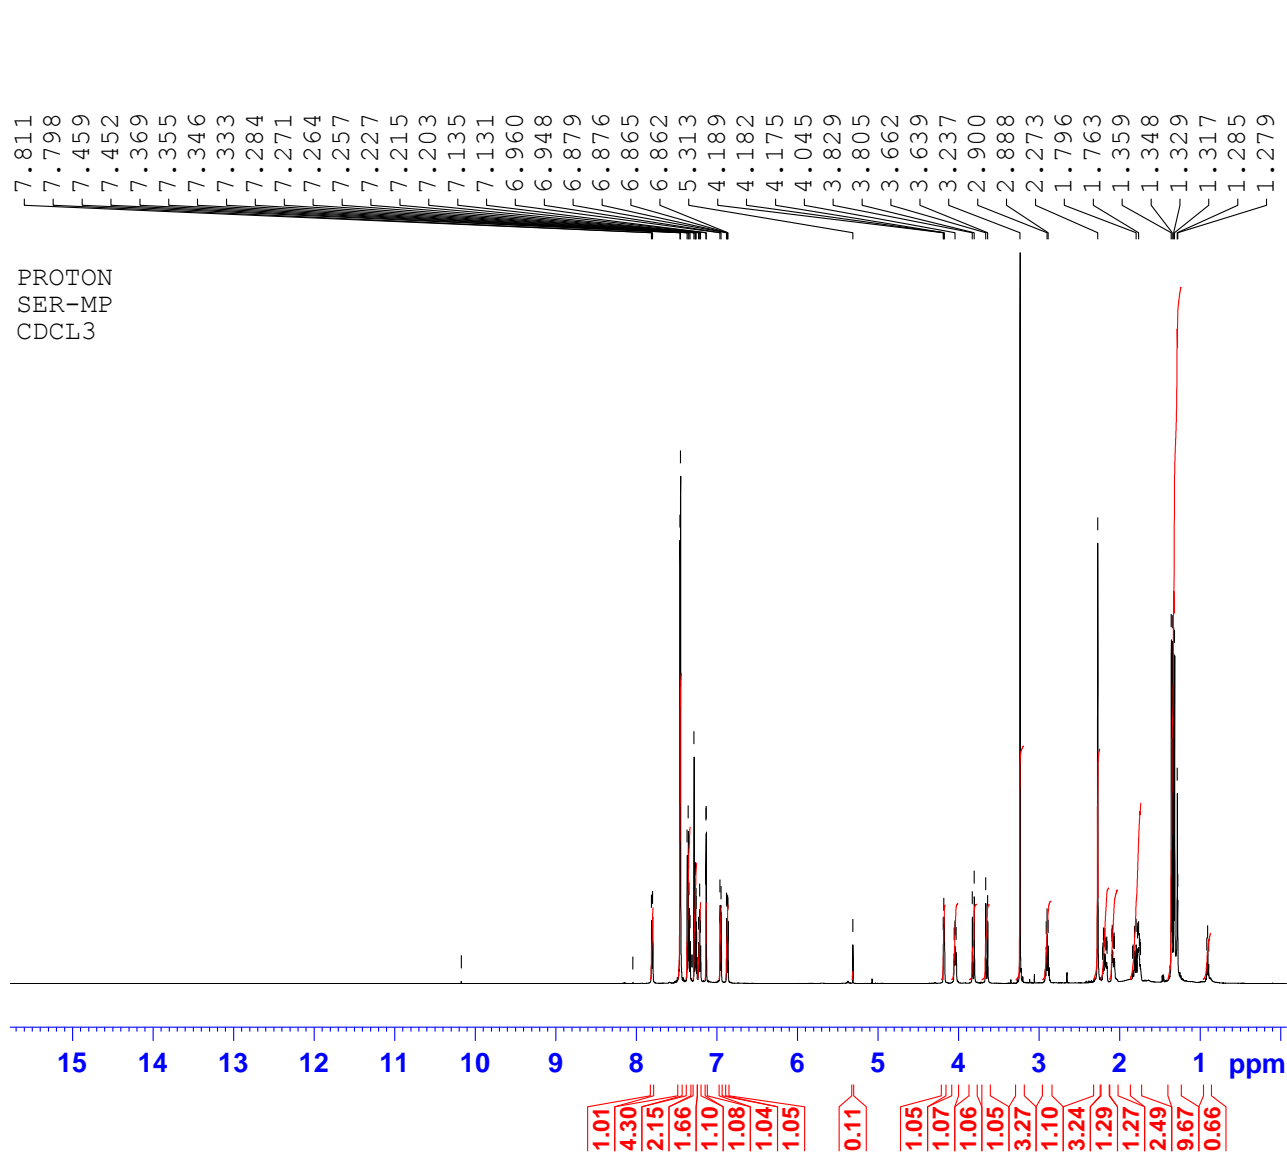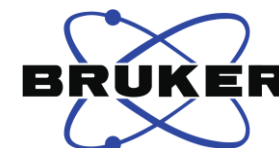

Current Data Parameters  
 NAME SER-MP  
 EXPNO 10  
 PROCNO 1

F2 - Acquisition Parameters  
 Date\_ 20250105  
 Time 14.59 h  
 INSTRUM spect  
 PROBHD Z814601\_0064 ( )  
 PULPROG zg30  
 TD 65536  
 SOLVENT CDCl<sub>3</sub>  
 NS 32  
 DS 2  
 SWH 12335.526 Hz  
 FIDRES 0.376450 Hz  
 AQ 2.6563926 sec  
 RG 74.07  
 DW 40.533 usec  
 DE 6.50 usec  
 TE 298.0 K  
 D1 1.00000000 sec  
 TD0 1  
 SFO1 600.1337061 MHz  
 NUC1 1H  
 P1 8.00 usec  
 PLW1 17.47500038 W

F2 - Processing parameters  
 SI 65536  
 SF 600.1300000 MHz  
 WDW EM  
 SSB 0  
 LB 0.30 Hz  
 GB 0  
 PC 1.00

PROTON  
SER-MP  
CDCL3

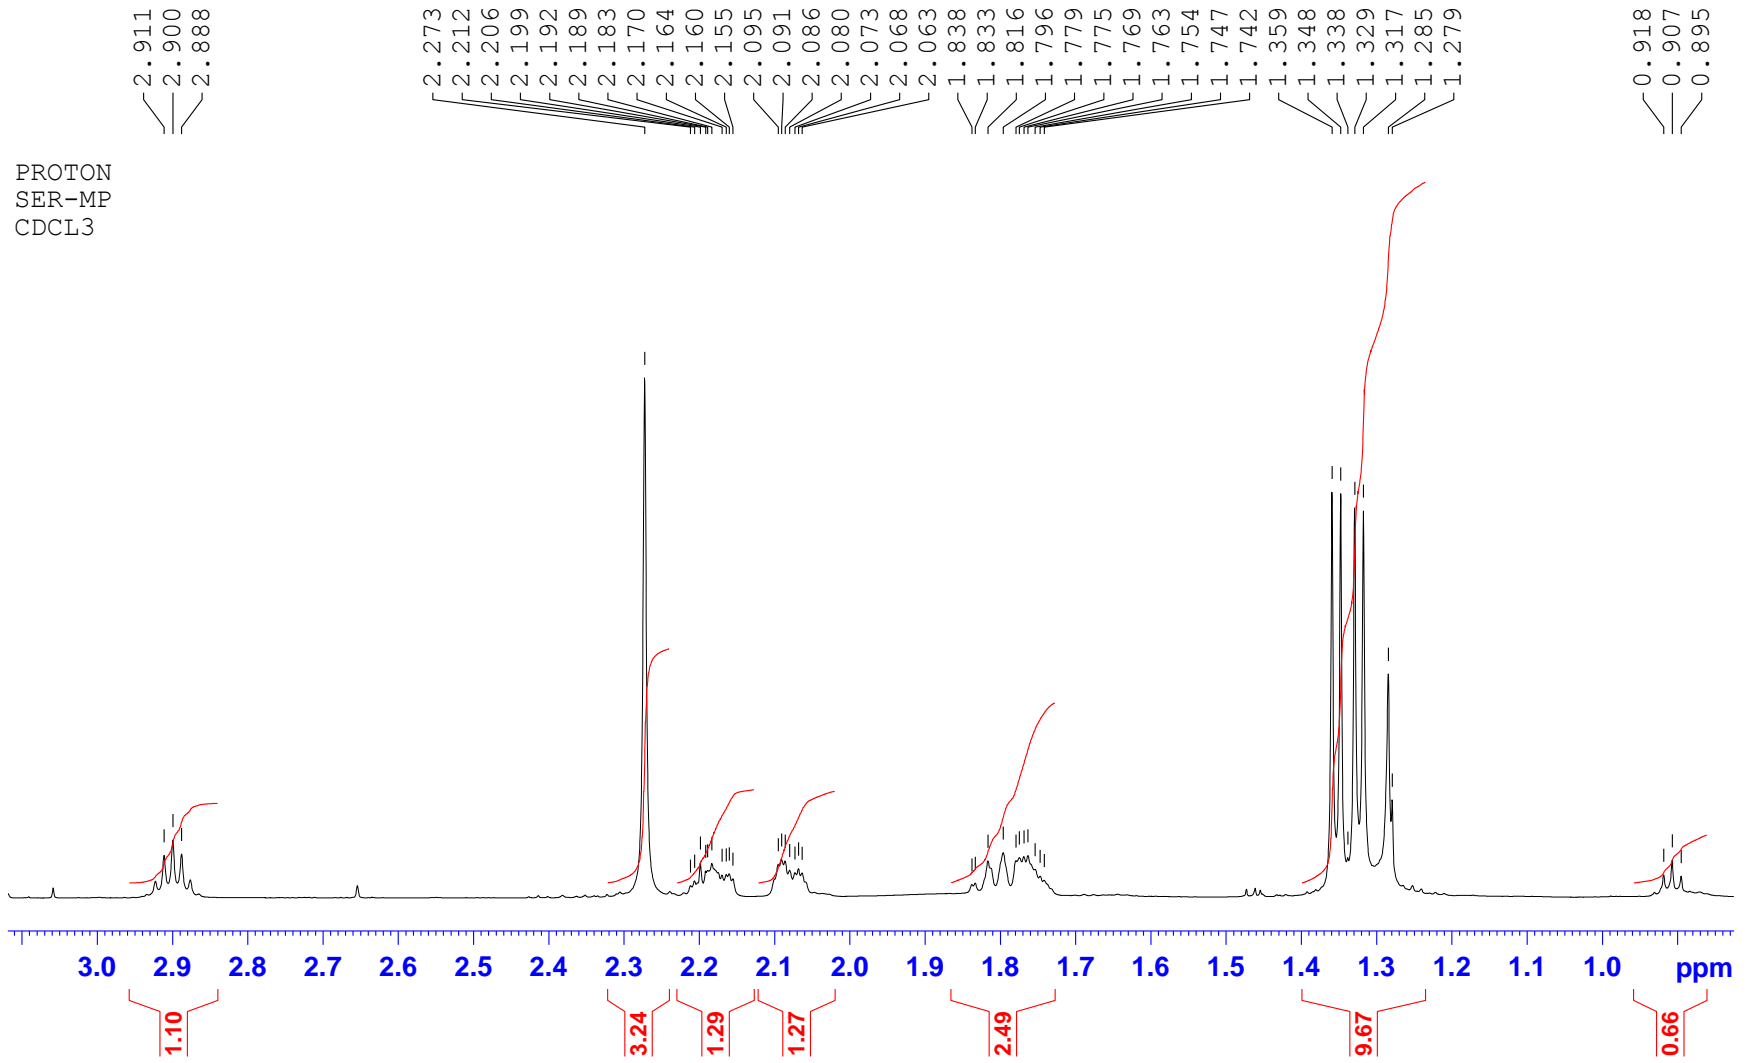

PROTON  
SER-MP  
CDCL3

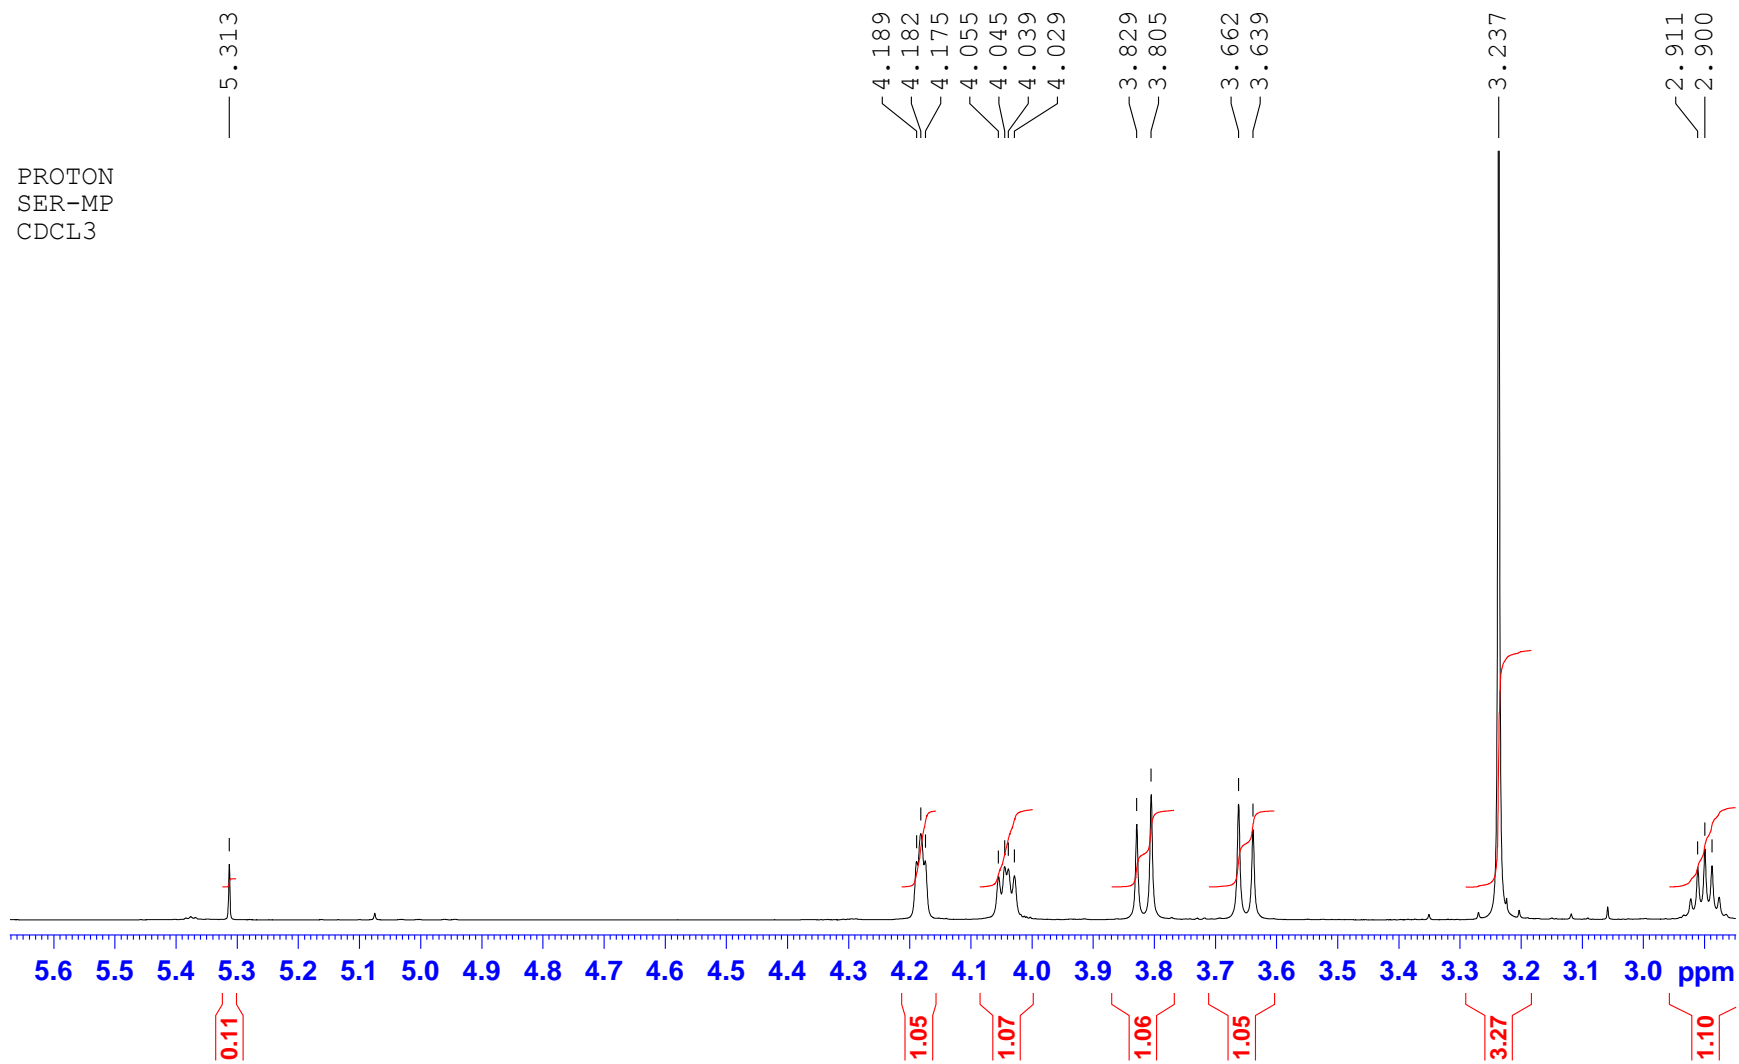

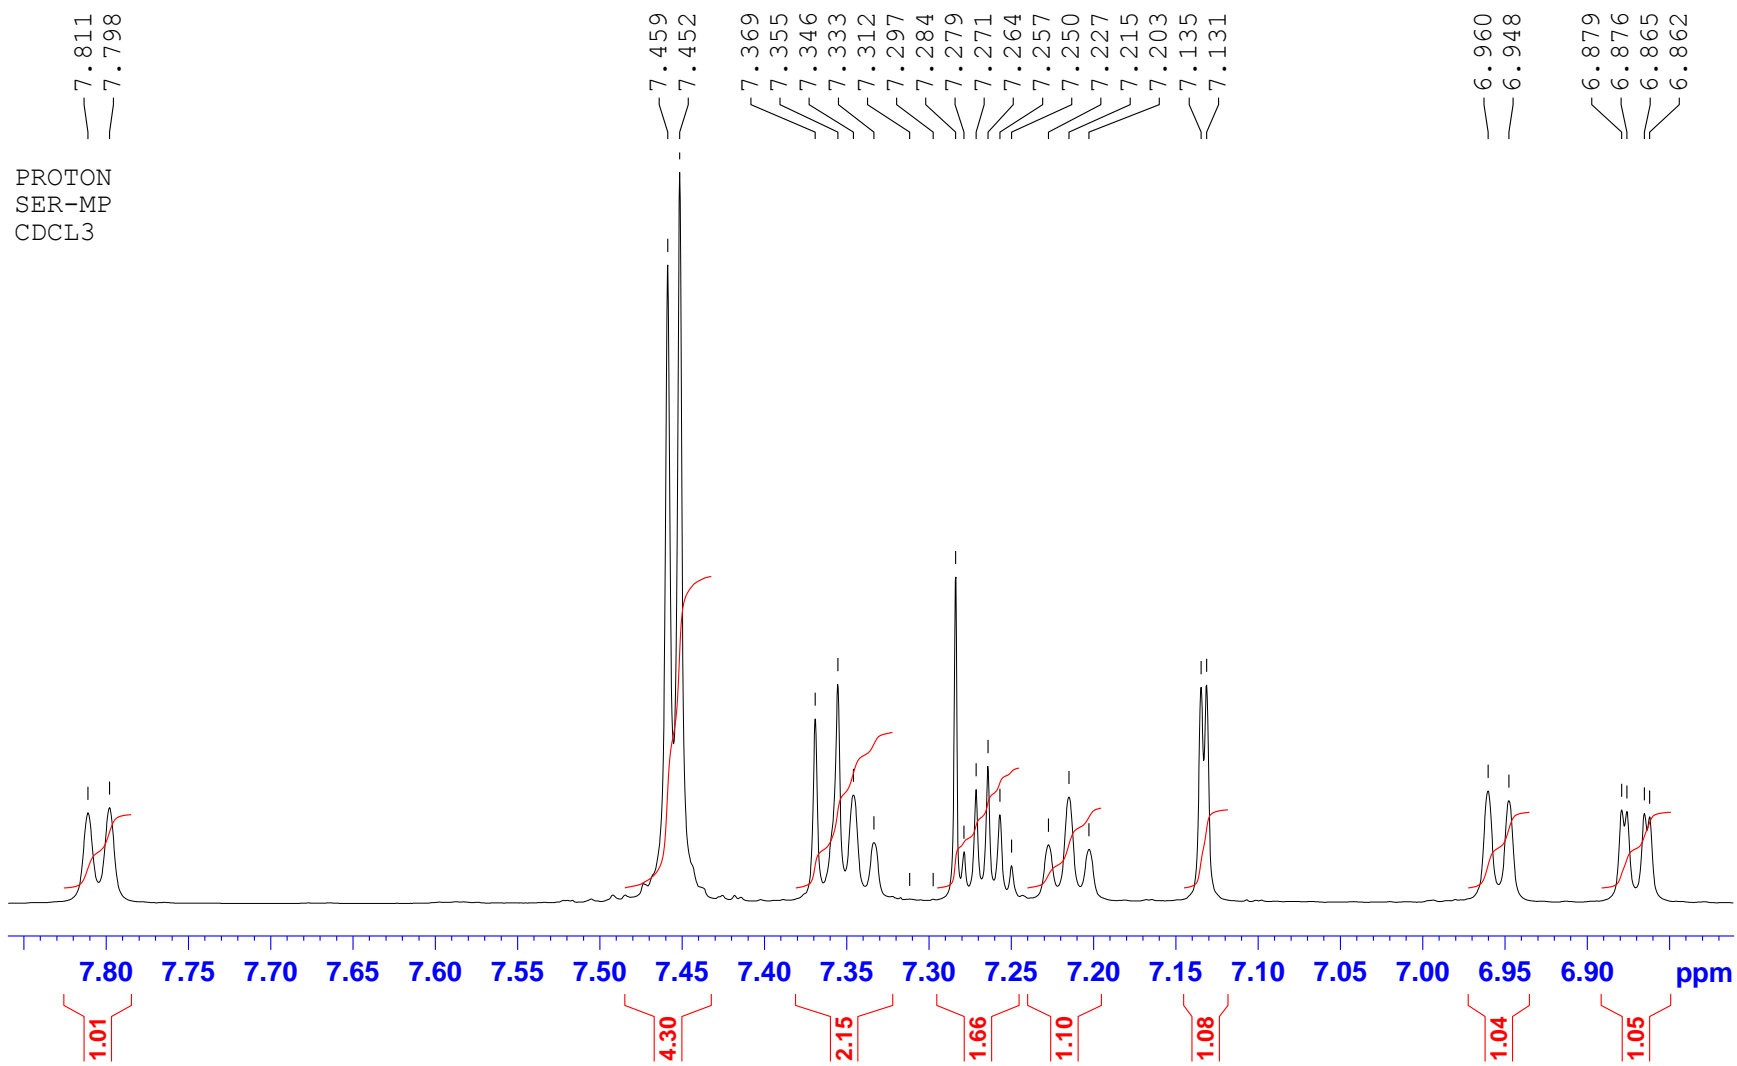

.Fig. S3. <sup>13</sup>C NMR spectrum of SER-MP in CDCl<sub>3</sub>

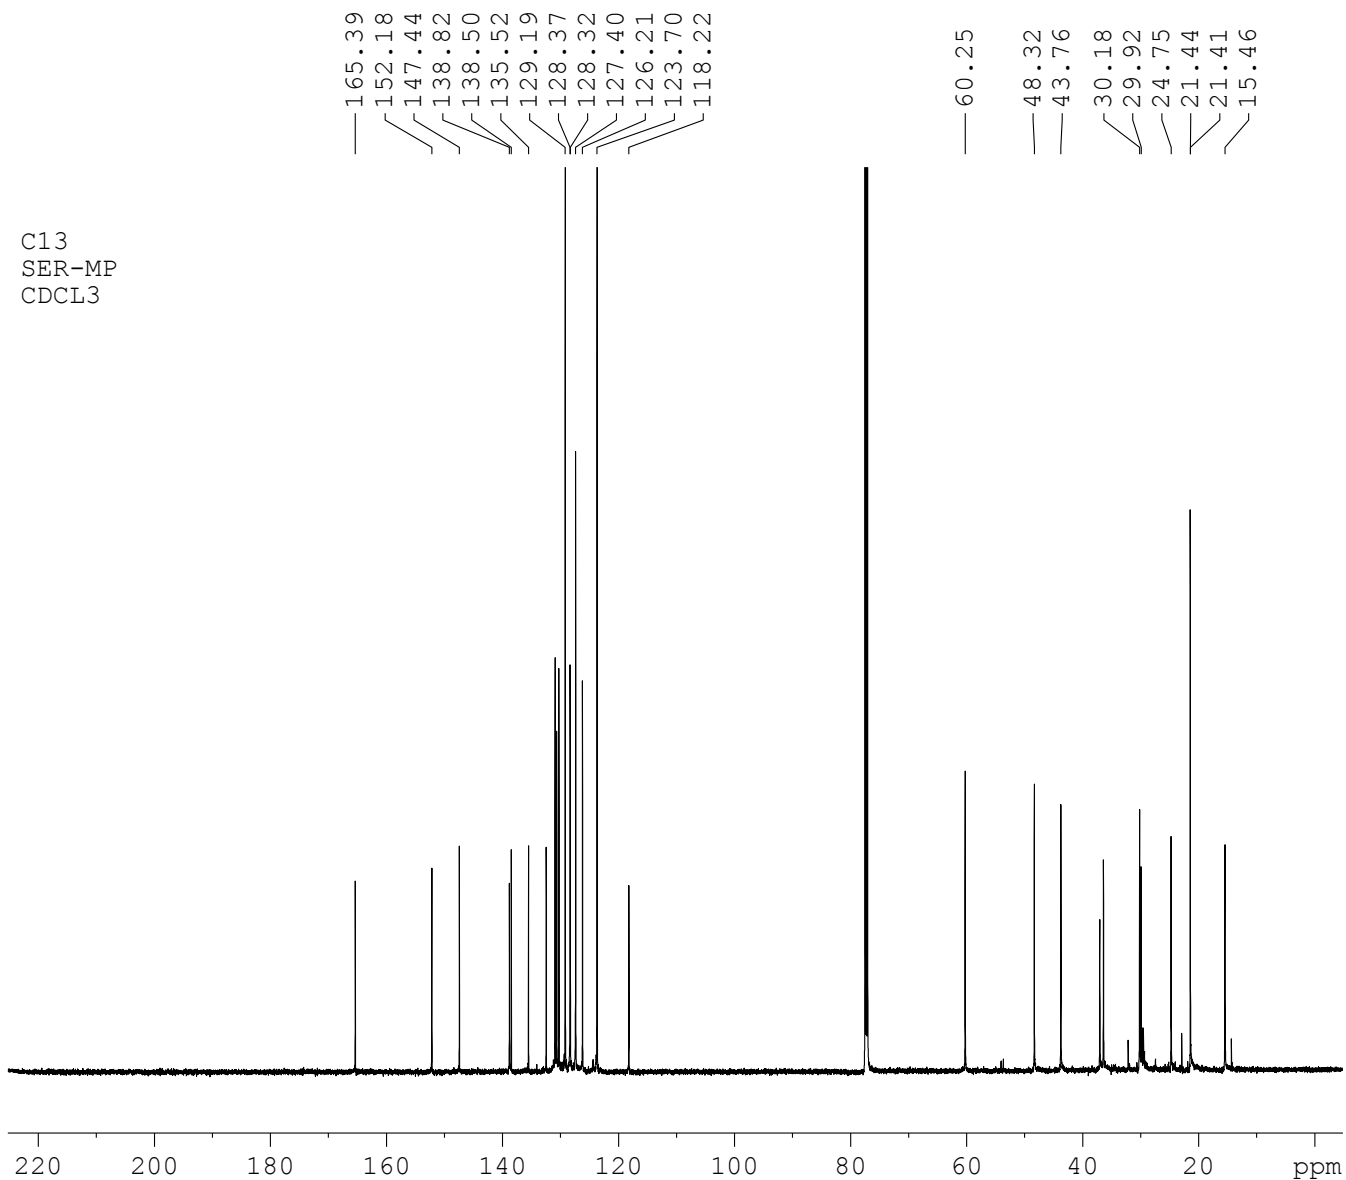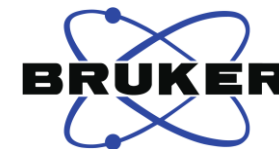

Current Data Parameters  
NAME SER-MP-C13  
EXPNO 10  
PROCNO 1

F2 - Acquisition Parameters

Date\_ 20250106  
Time\_ 2.34 h  
INSTRUM spect  
PROBHD Z814601\_0064 (  
PULPROG zgpg30  
TD 32768  
SOLVENT CDCl3  
NS 16384  
DS 4  
SWH 34722.223 Hz  
FIDRES 2.119276 Hz  
AQ 0.4718592 sec  
RG 173.48  
DW 14.400 usec  
DE 6.50 usec  
TE 298.0 K  
D1 2.00000000 sec  
D11 0.03000000 sec  
TD0 1  
SFO1 150.9194083 MHz  
NUC1 13C  
P1 15.00 usec  
PLW1 111.94000244 W  
SFO2 600.1319193 MHz  
NUC2 1H  
CPDPRG[2] waltz16  
PCPD2 70.00 usec  
PLW2 17.47500038 W  
PLW12 0.22825000 W  
PLW13 0.11481000 W

F2 - Processing parameters

SI 32768  
SF 150.9027768 MHz  
WDW EM  
SSB 0  
LB 1.00 Hz  
GB 0  
PC 1.40

C13  
SER-MP  
CDCL3

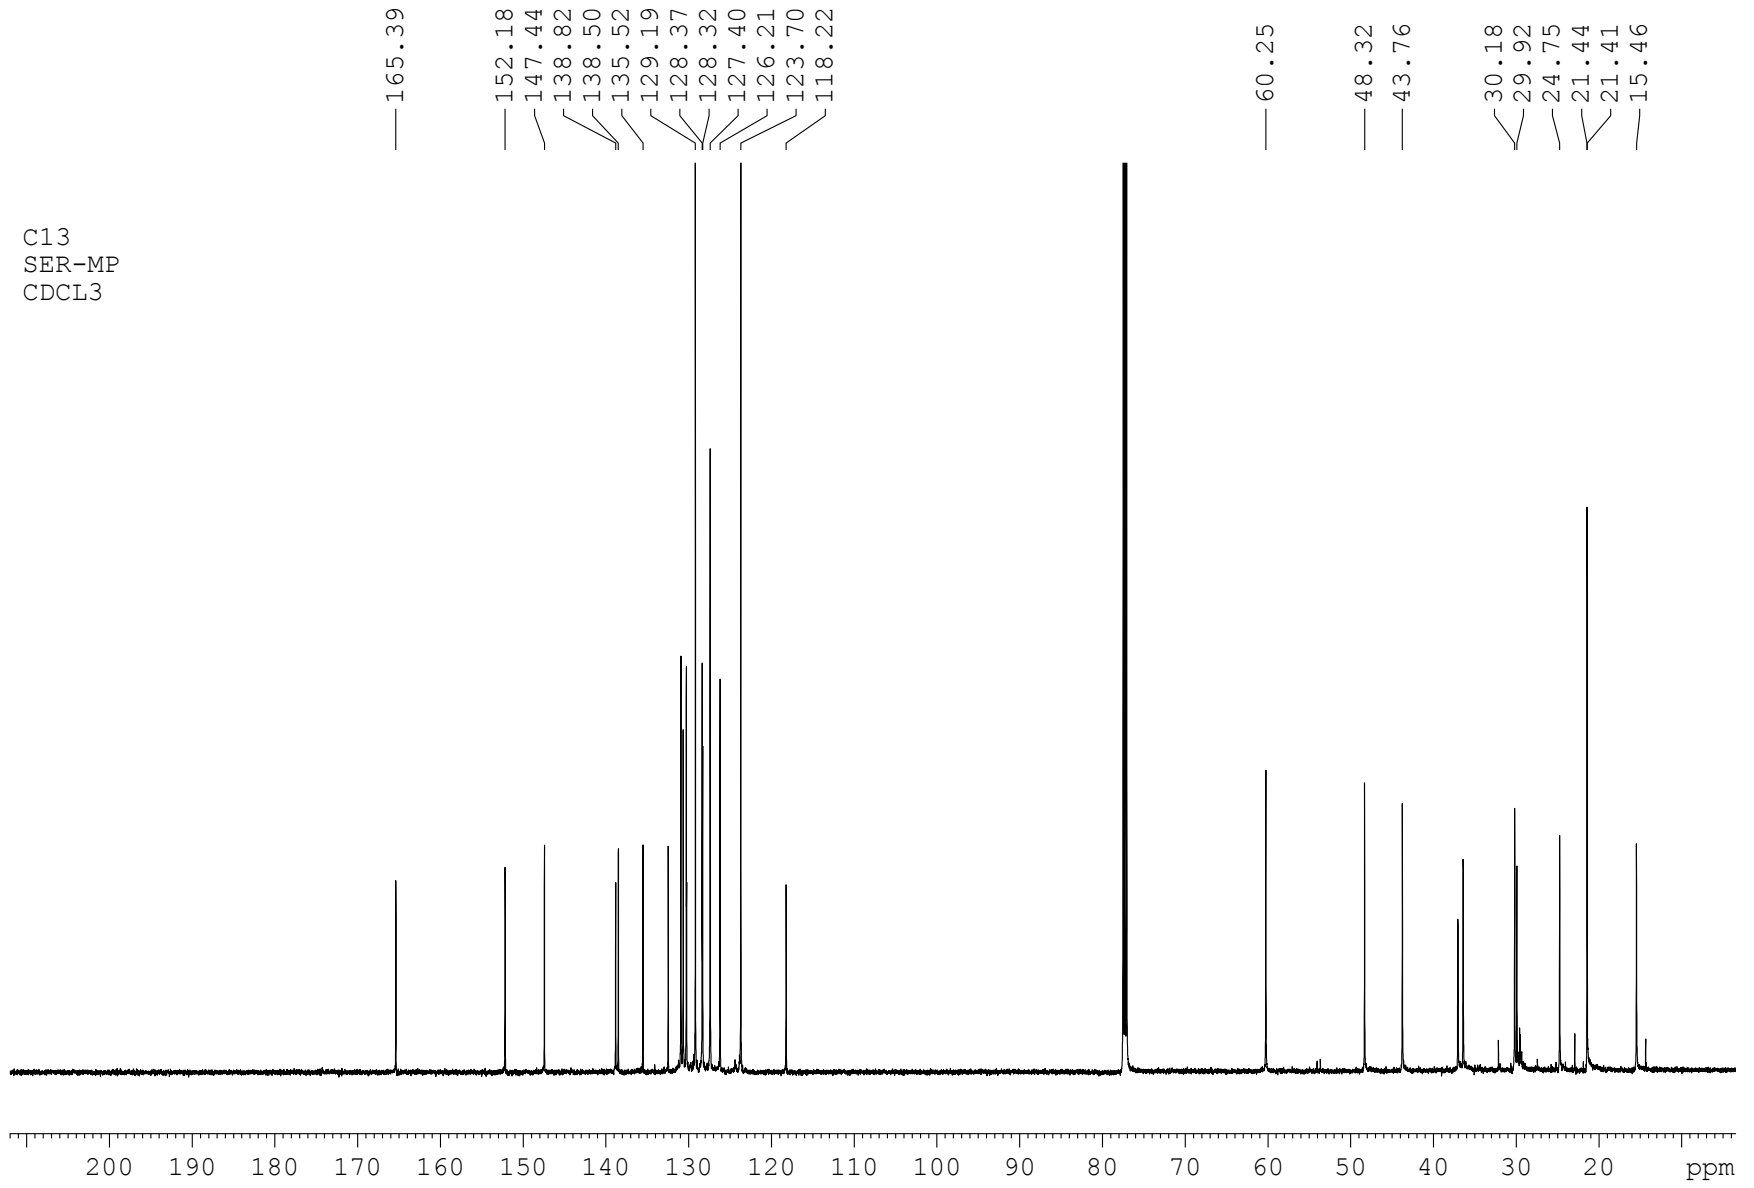



C13  
SER-MP  
CDCL3

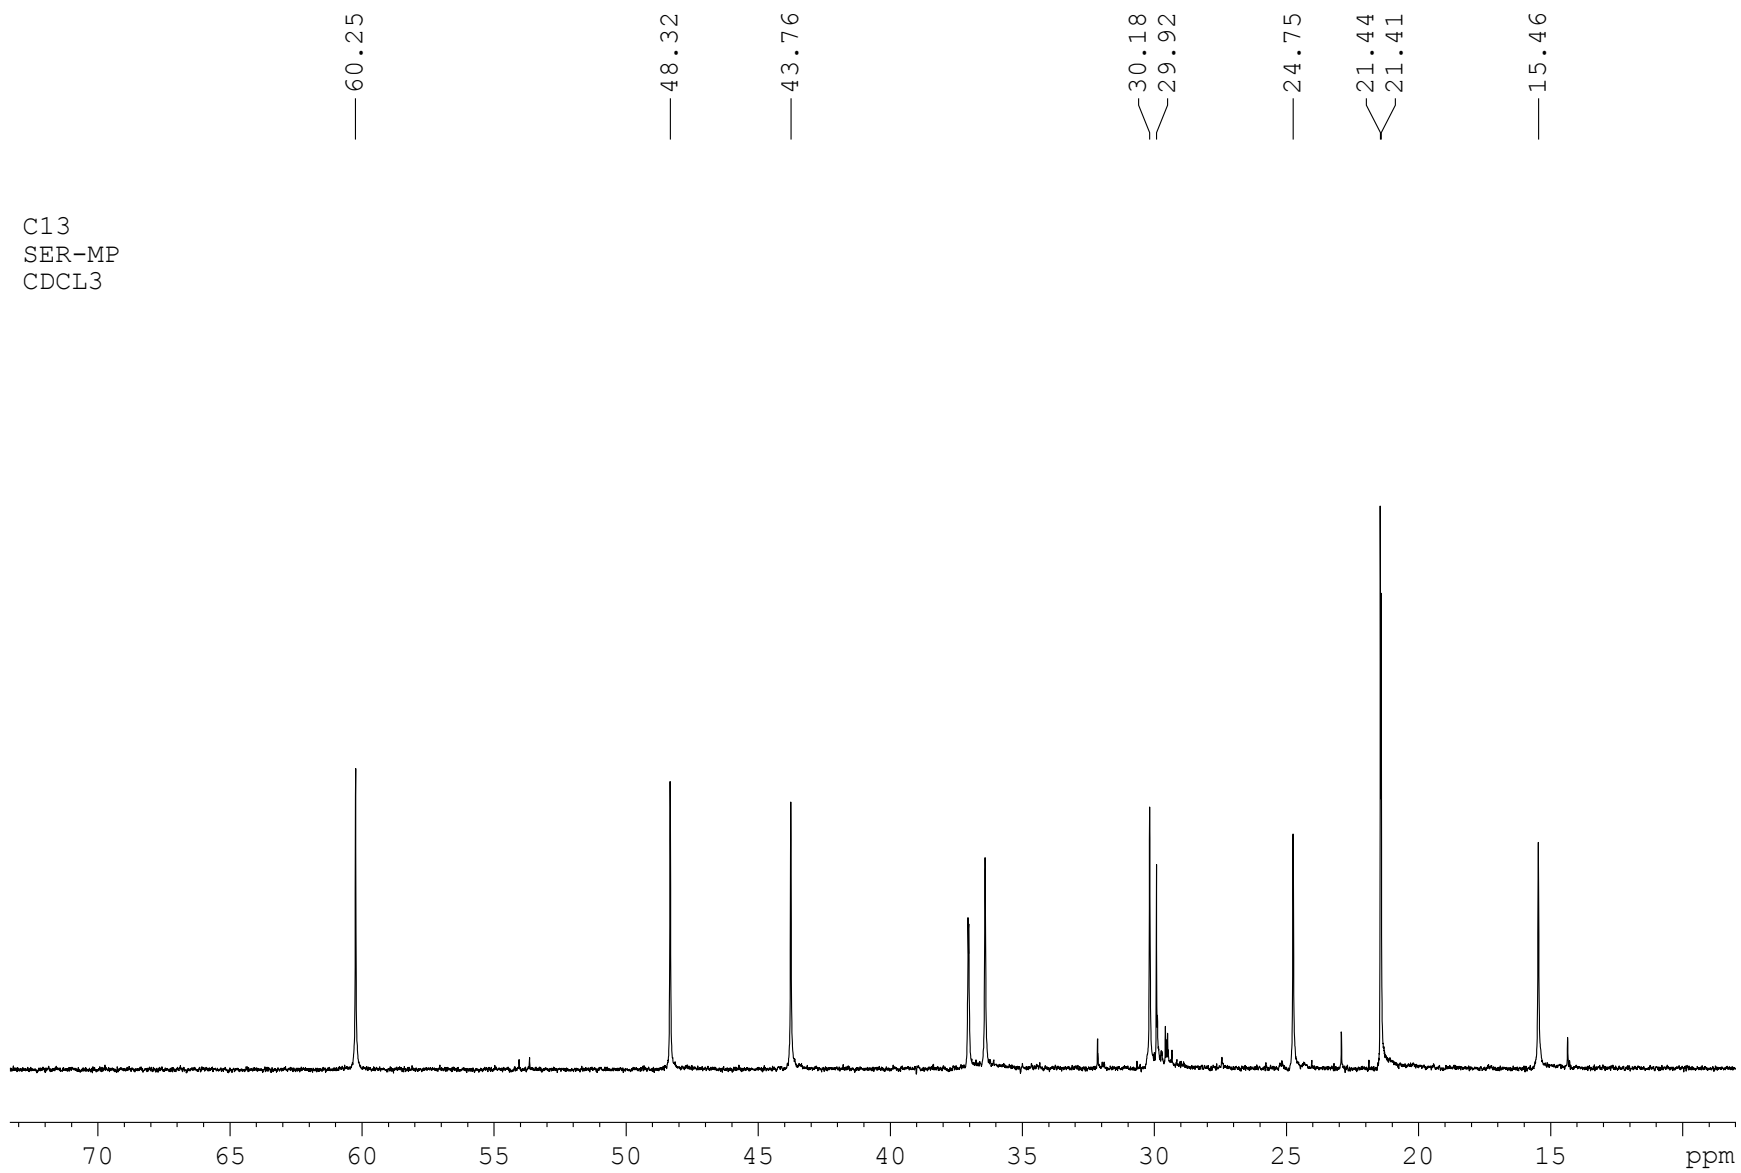

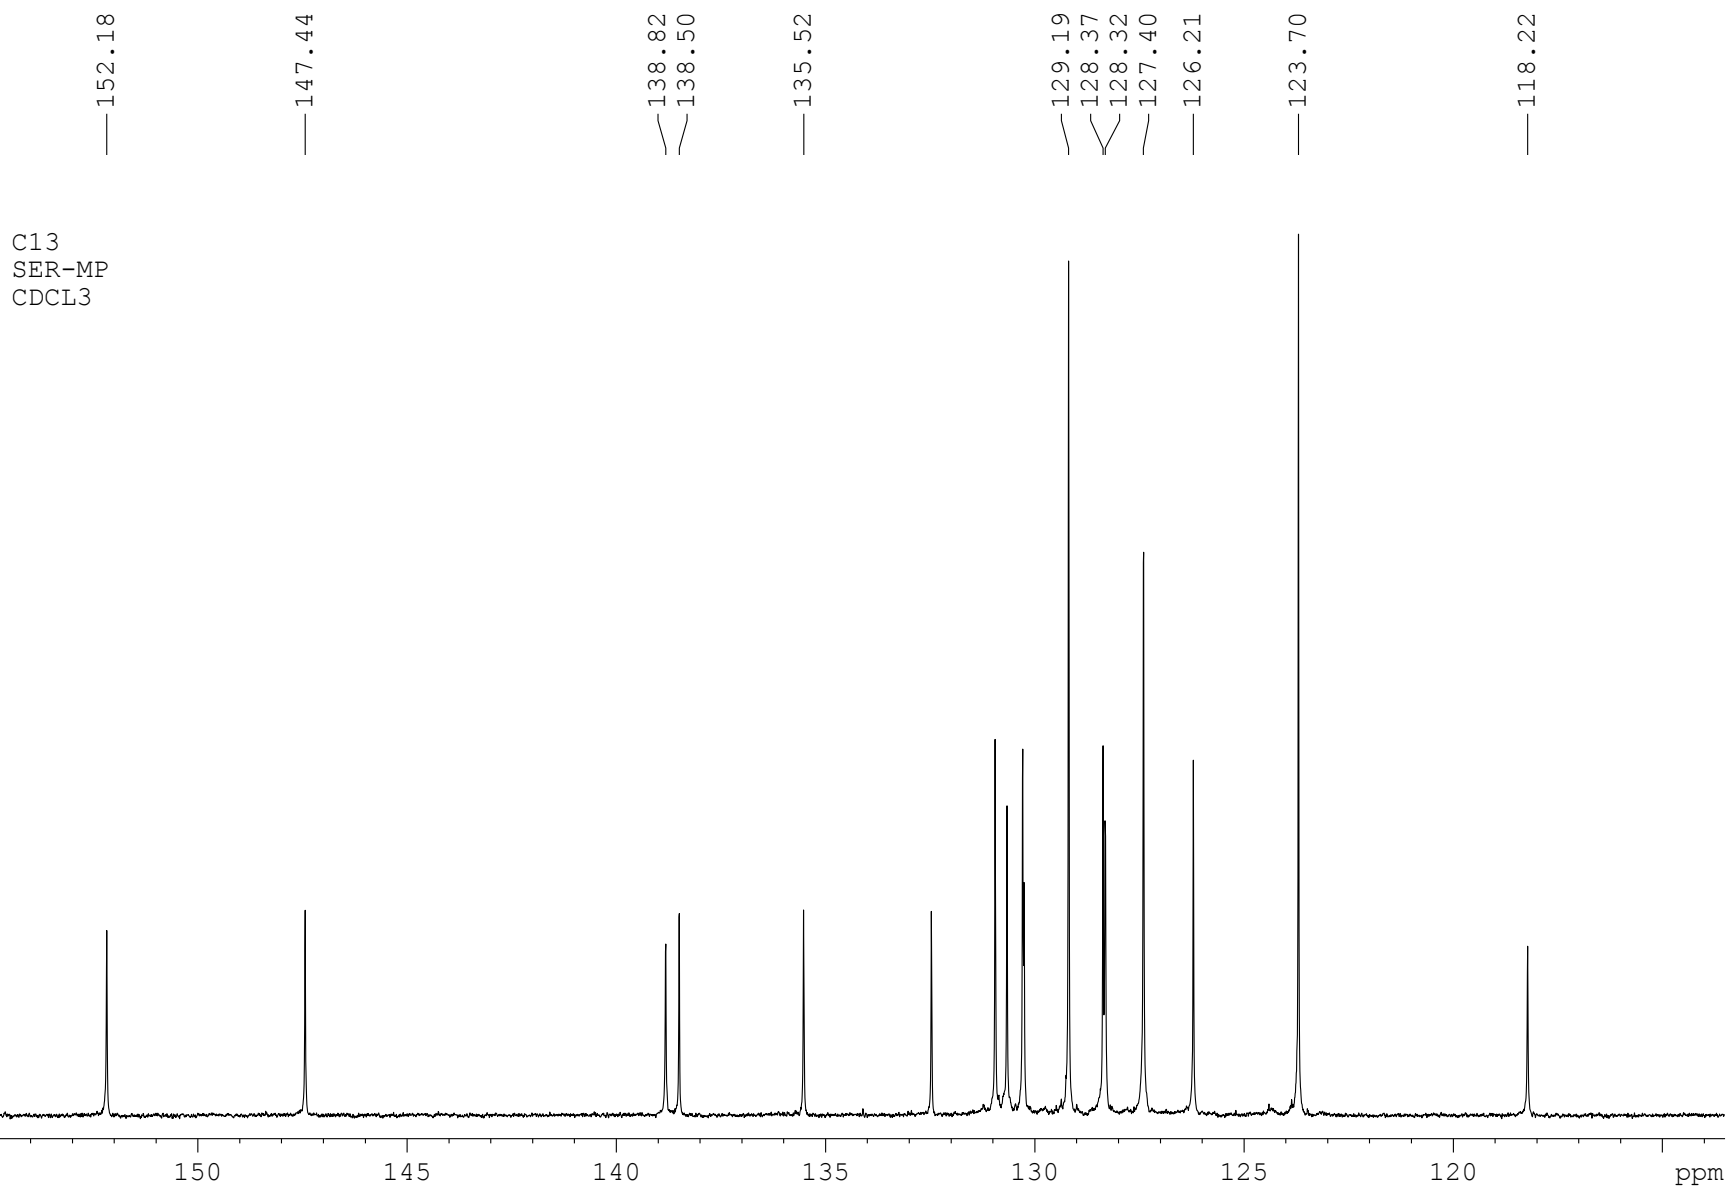

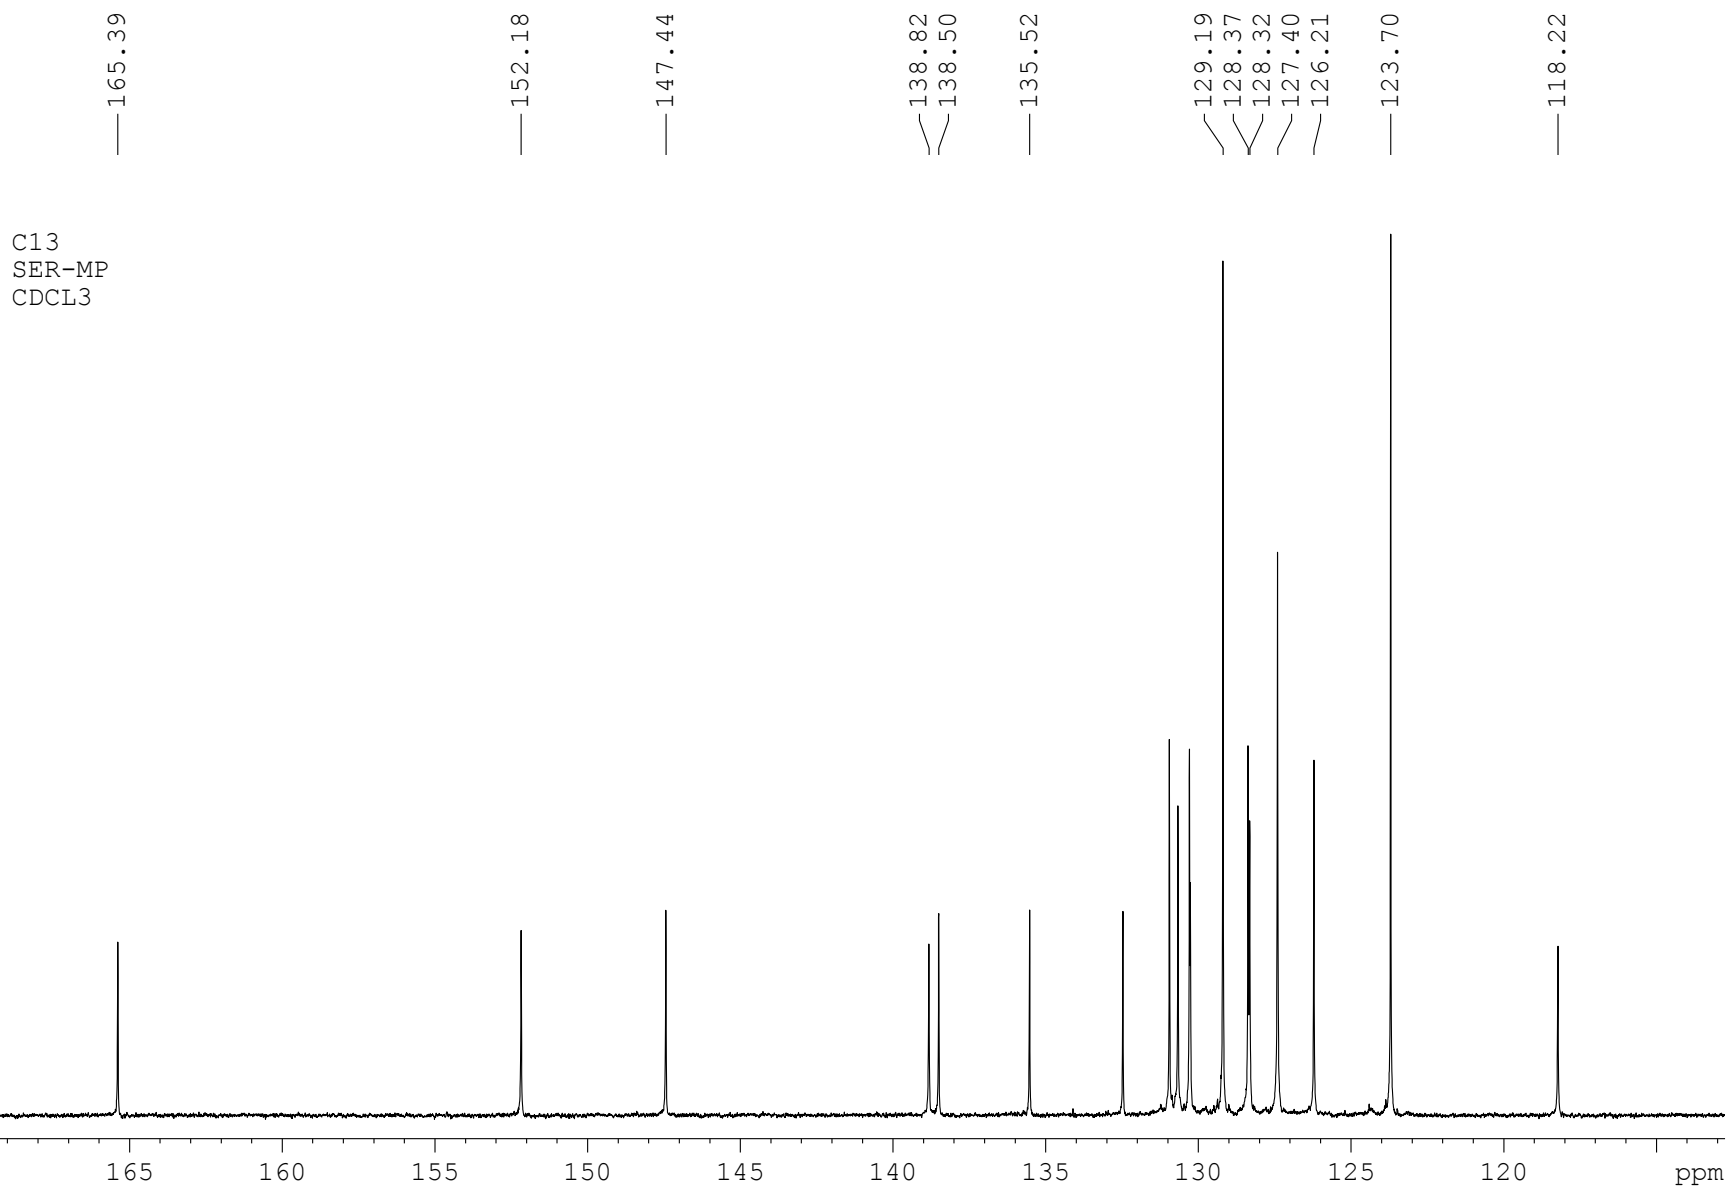

Supplement: d4ra08357a1.pdf [file d4ra08357a1.pdf]
